# Supplementary material
Source: PubMed Central journal article supplement (PMC1557609)
Supplement: plntphys_pp.106.081141_2.pdf [file plntphys_pp.106.081141_2.pdf]

**Supplemental Dataset 1.** Mapman visualization of data presented in this study. See 'readme' for Mapman software details. Briefly, this dataset contains excel tables of the gene lists used in our analyses. These are the 1000 most significant (ACC\_capacity\_Top1000.xls) and all significant (ACC\_capacity\_FDRp\_0.05.xls) up- and down-regulated genes for each accession during cold acclimation, genes positively and negatively correlating with acclimated freezing tolerance for the core accessions (ACC\_Correlation\_FDRp\_0.05.xls) and genes up- and down-regulated in Te or Can in comparison to the early flowering accessions (NA\_FDRp\_0.05.xls ) (compare Supplemental Figure 1).
