# Supplementary material
Source: PubMed Central journal article supplement (PMC1557609)
Supplement: plntphys_pp.106.081141_3.pdf [file plntphys_pp.106.081141_3.pdf]

**Supplemental Figure 1.** Mapman visualization of general metabolism pathways for gene lists used in this study. These lists are the 1000 most significant up- and down-regulated genes for each accession during cold acclimation, the 423 genes significantly changed during cold acclimation in all accessions, genes positively and negatively correlating with acclimated freezing tolerance for the core accessions and genes up- and down-regulated in Te or Can in comparison to the other accessions. Except for the correlations, data are the mean fold changes of GCRMA (log<sub>2</sub> scale) expression estimates for the comparison of interest. The intensity of blue or red colour indicates the magnitude of up- and down-regulation, respectively. For the list of genes correlating with acclimated freezing tolerance, blue and red respectively indicate positively and negatively correlating genes. Interactive viewing of these data and of other pathways via the Mapman software is strongly encouraged and details are provided in Supplemental Dataset 1.

# Te Top 1000

## minor CHO

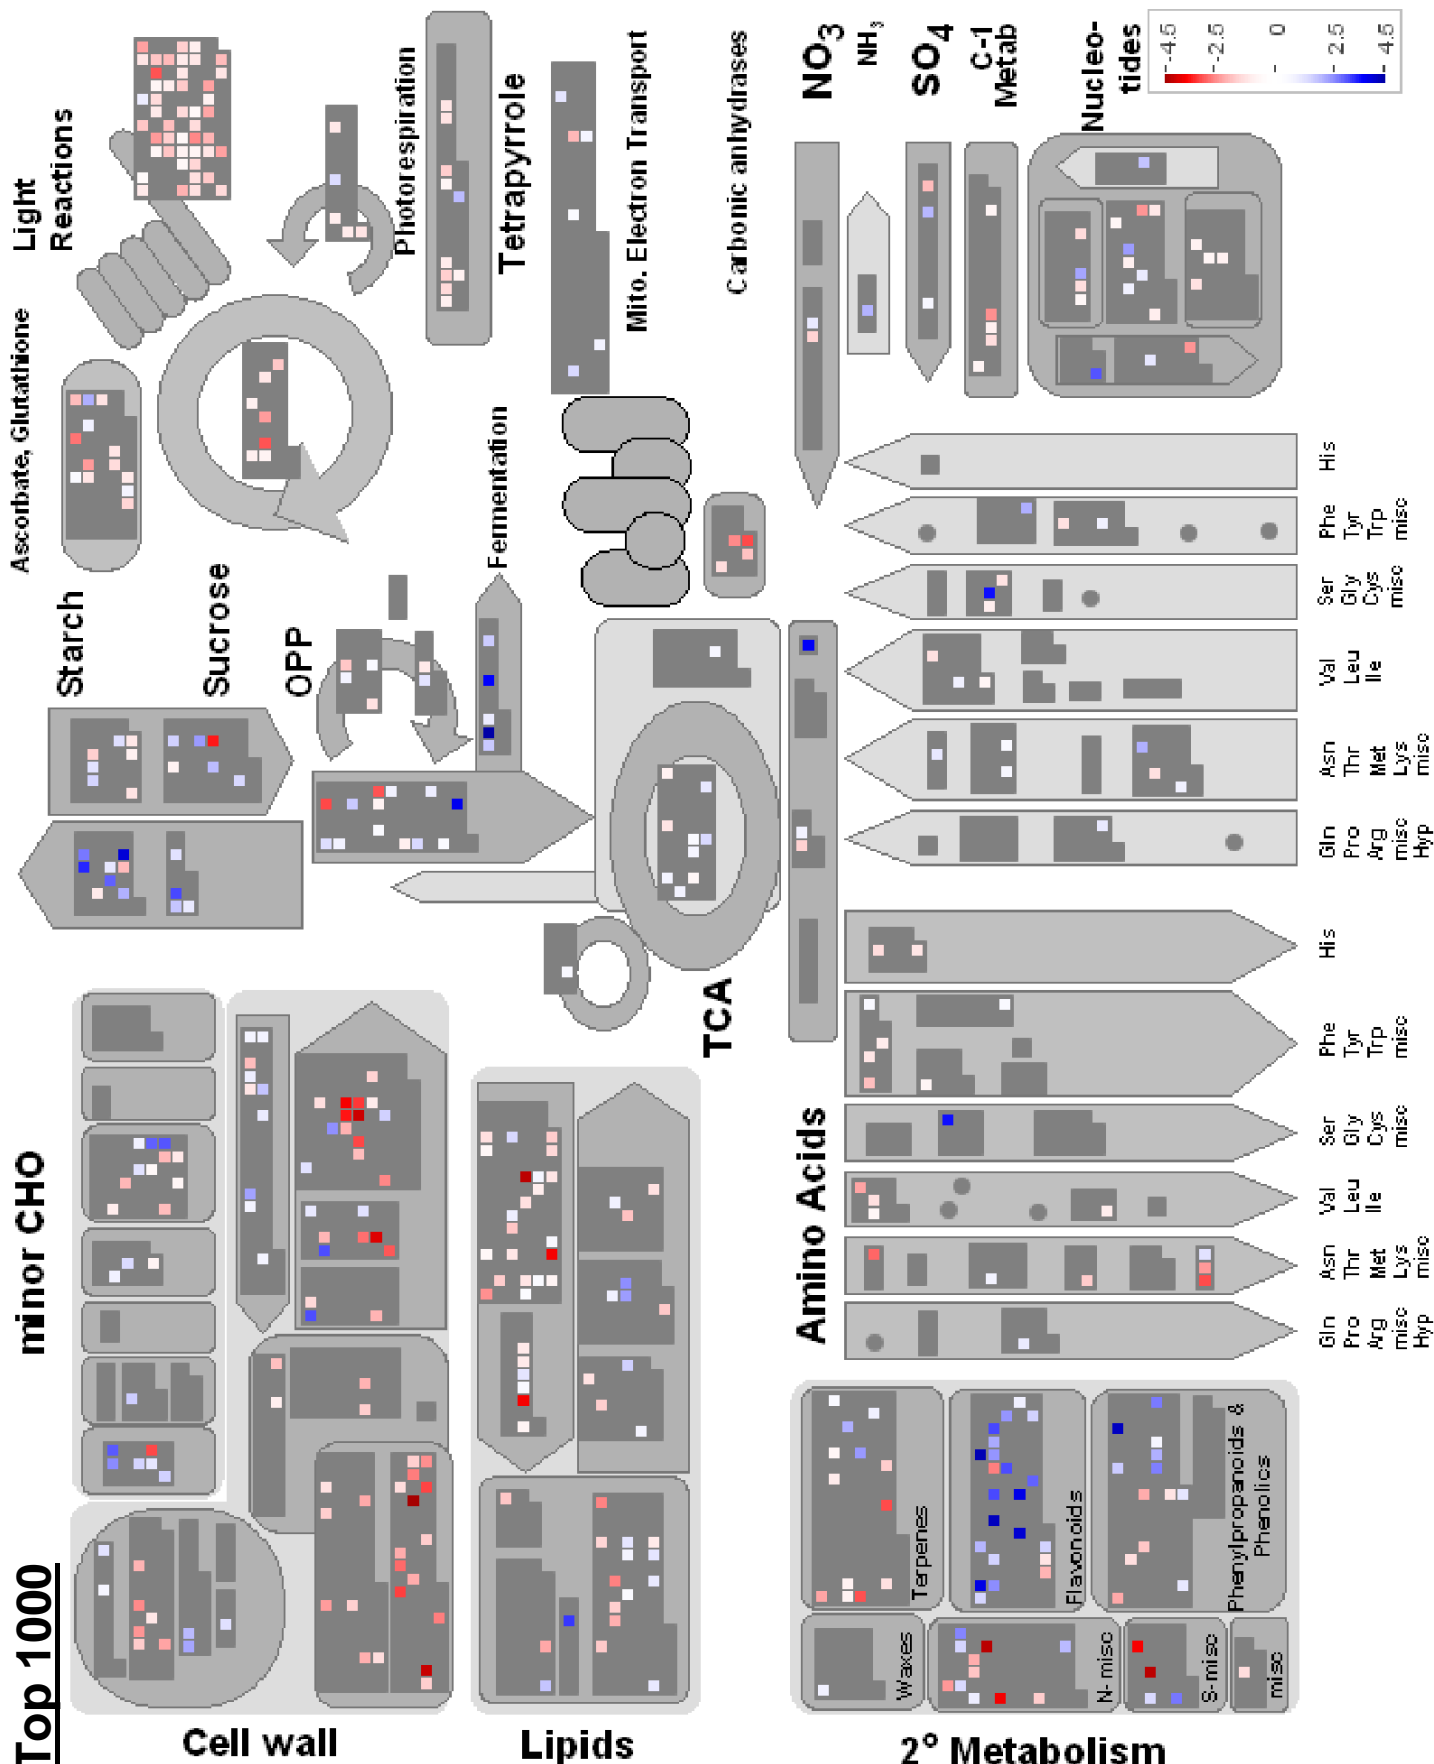

Cell wall

Lipids

2° Metabolism

# Rsch Top 1000

## minor CHO

## Light Reactions

## Ascorbate, Glutathione

## Starch

## Sucrose

## OPP

## Fermentation

## Photorespiration

## Tetrapyrrole

## Mito. Electron Transport

## TCA

## Carbonic anhydrases

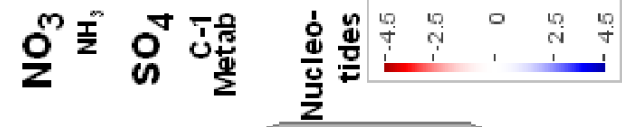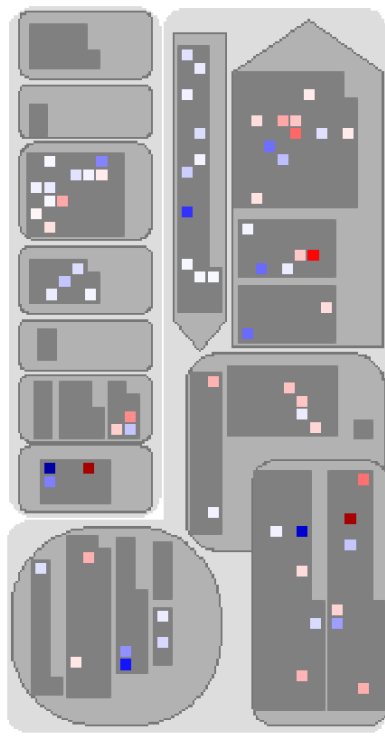

Cell wall

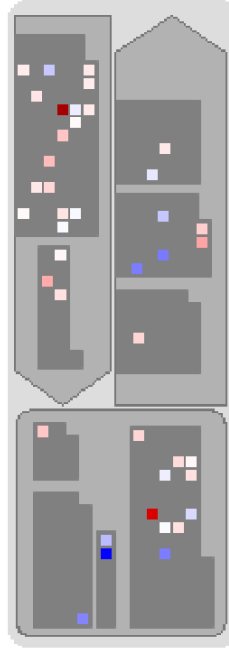

Lipids

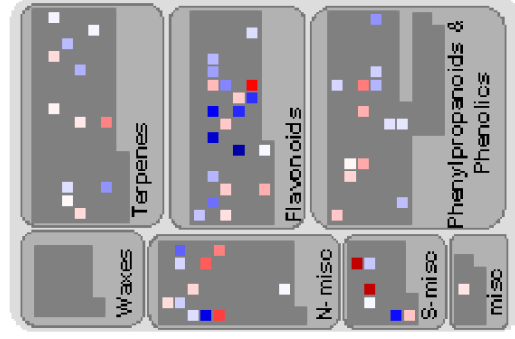

2° Metabolism

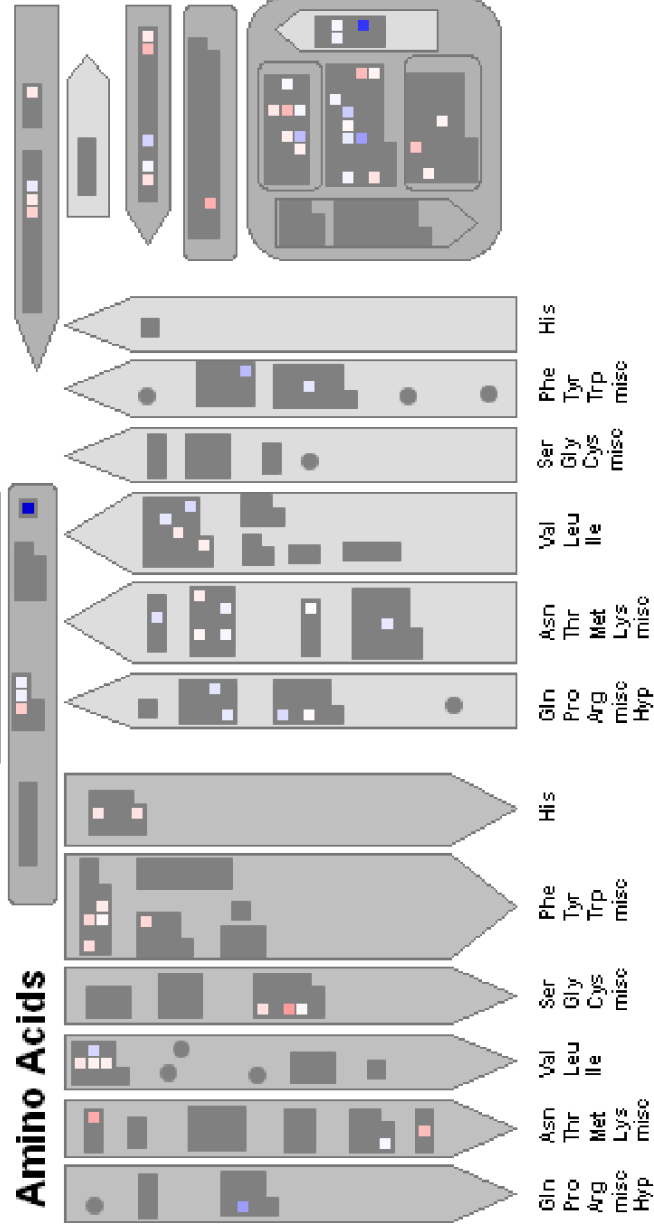

## Amino Acids

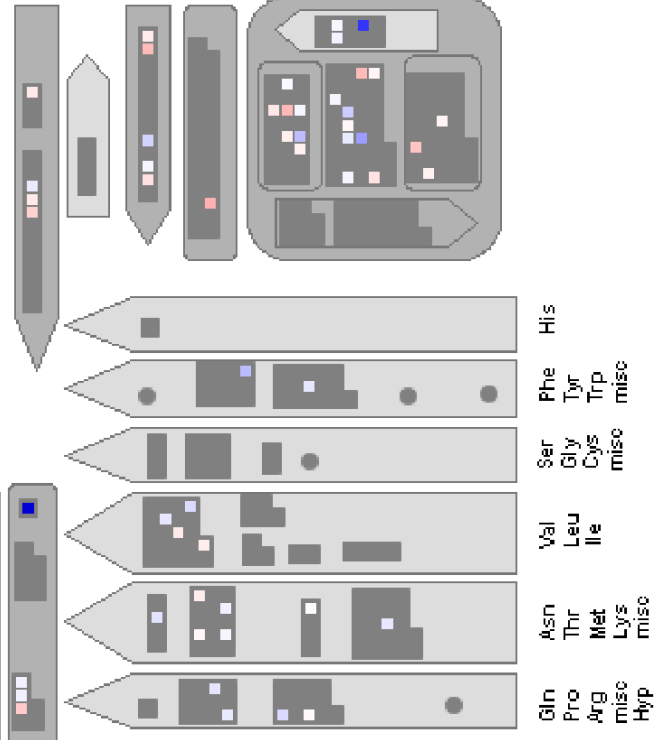

## NO<sub>3</sub>

## NH<sub>3</sub>

## SO<sub>4</sub>

## C-1 Metab

## Nucleotides

- Gln
- Pro
- Arg
- misc
- Hyp
- Asn
- Thr
- Met
- Lys
- misc
- Val
- Leu
- Ile
- Ser
- Gly
- Cys
- misc
- Phe
- Tyr
- Trp
- misc
- His

# Col-0 Top 1000

## minor CHO

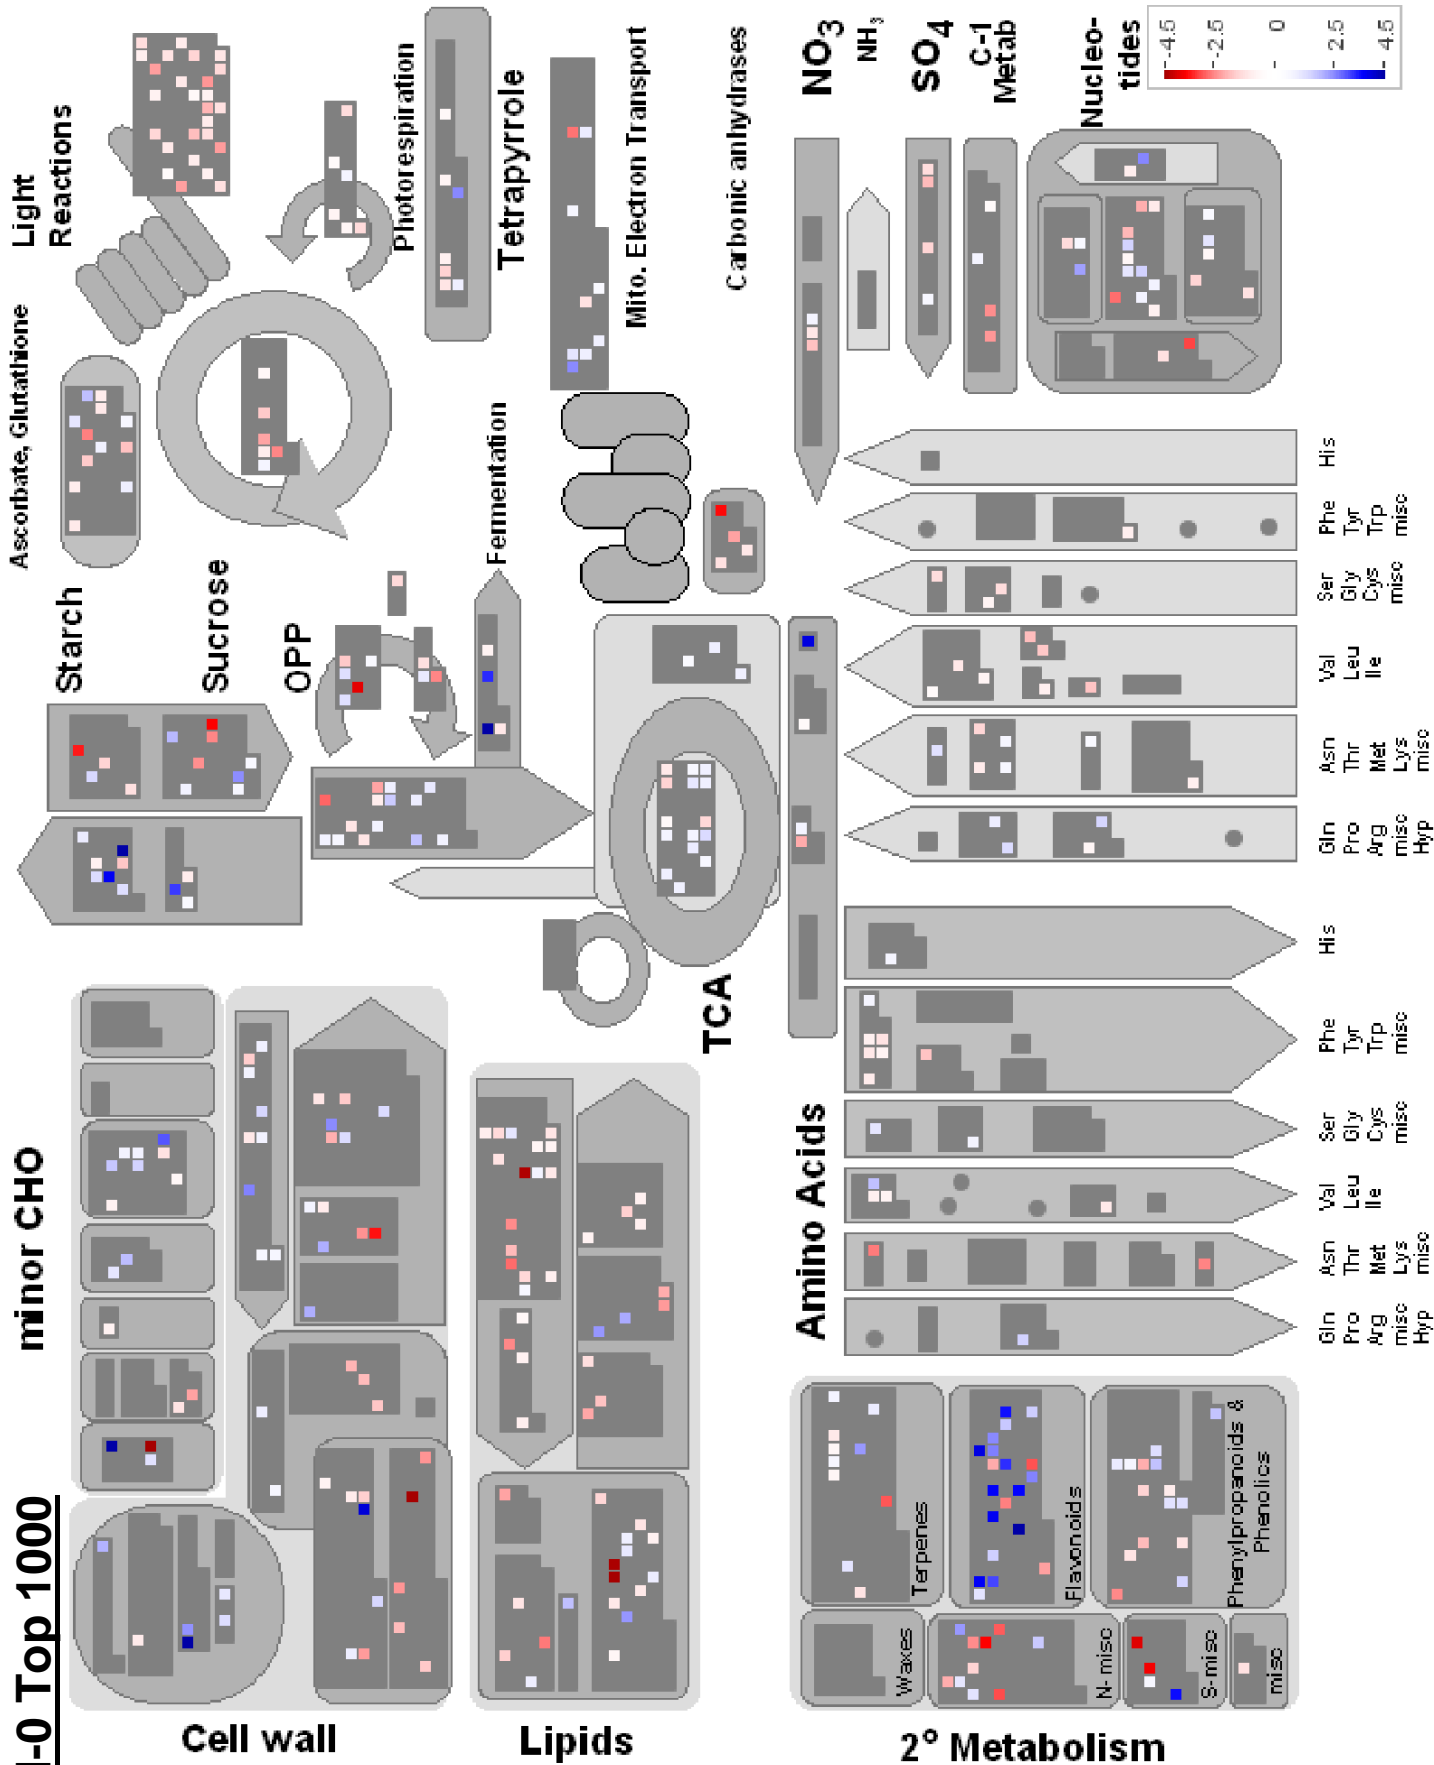

# Nd Top 1000

## minor CHO

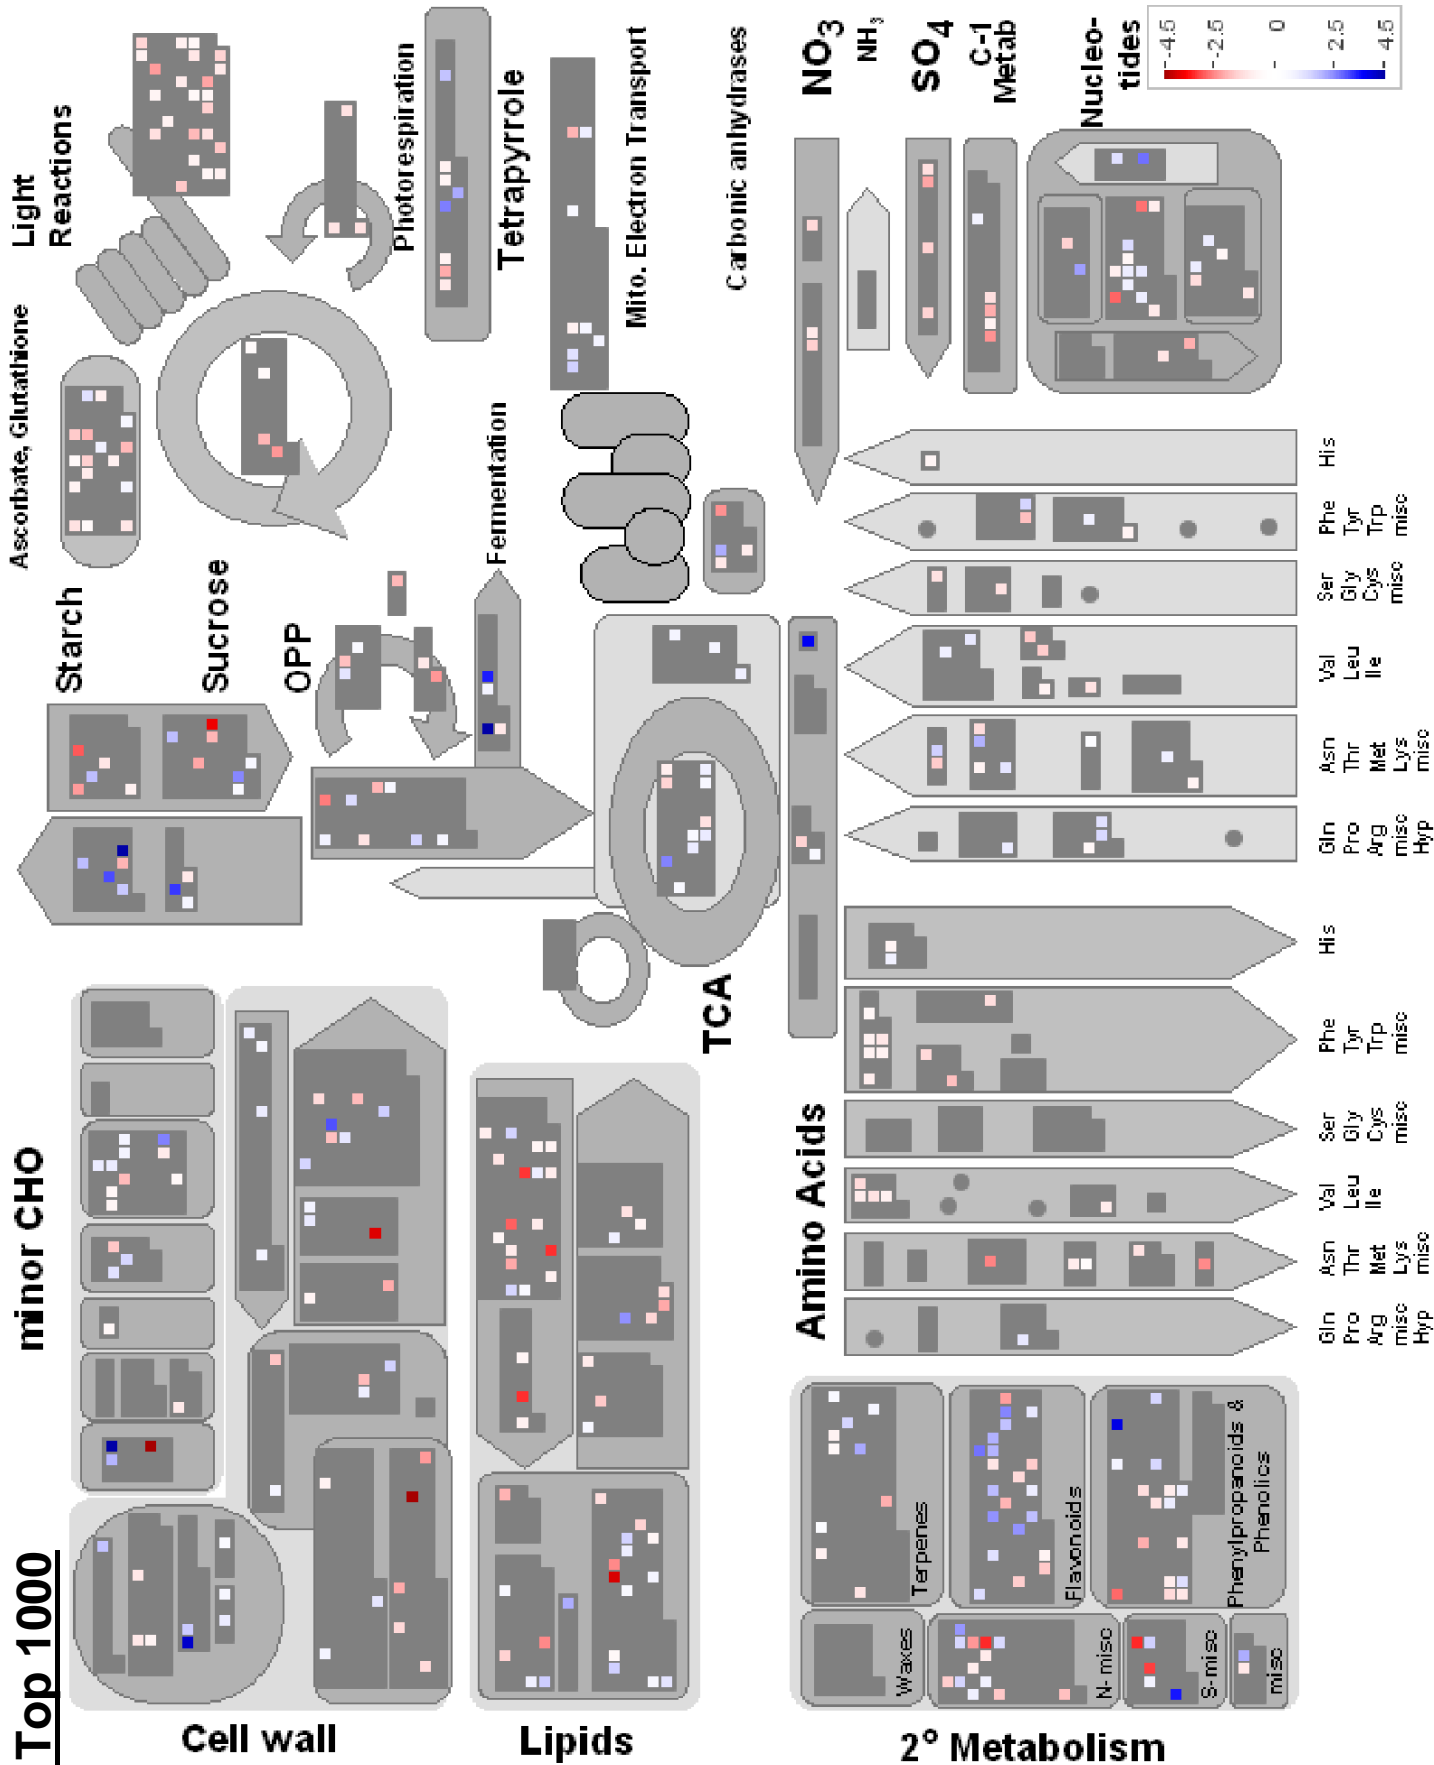

Cell wall

Lipids

2° Metabolism

Amino Acids

TCA

Fermentation

OPP

Sucrose

Starch

Ascorbate, Glutathione

Light Reactions

Photorespiration

Tetrapyrrole

Mito. Electron Transport

Carbonic anhydrases

NO<sub>3</sub>

NH<sub>3</sub>

SO<sub>4</sub>

C-1 Metab

Nucleotides

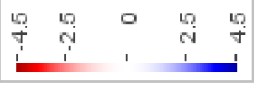

- His
- Phe
- Tyr
- Trp
- misc
- Ser
- Gly
- Cys
- misc
- Val
- Leu
- Ile
- Asn
- Thr
- Met
- Lys
- Gln
- Pro
- Arg
- misc
- Hyp
- His
- Phe
- Tyr
- Trp
- misc
- Ser
- Gly
- Cys
- misc
- Val
- Leu
- Ile
- Asn
- Thr
- Met
- Lys
- Gln
- Pro
- Arg
- misc
- Hyp

- Waxes
- Terpenes
- Flavonoids
- Phenylpropanoids & Phenolics
- N-misc
- S-misc
- misc

# Ler Top 1000

## minor CHO

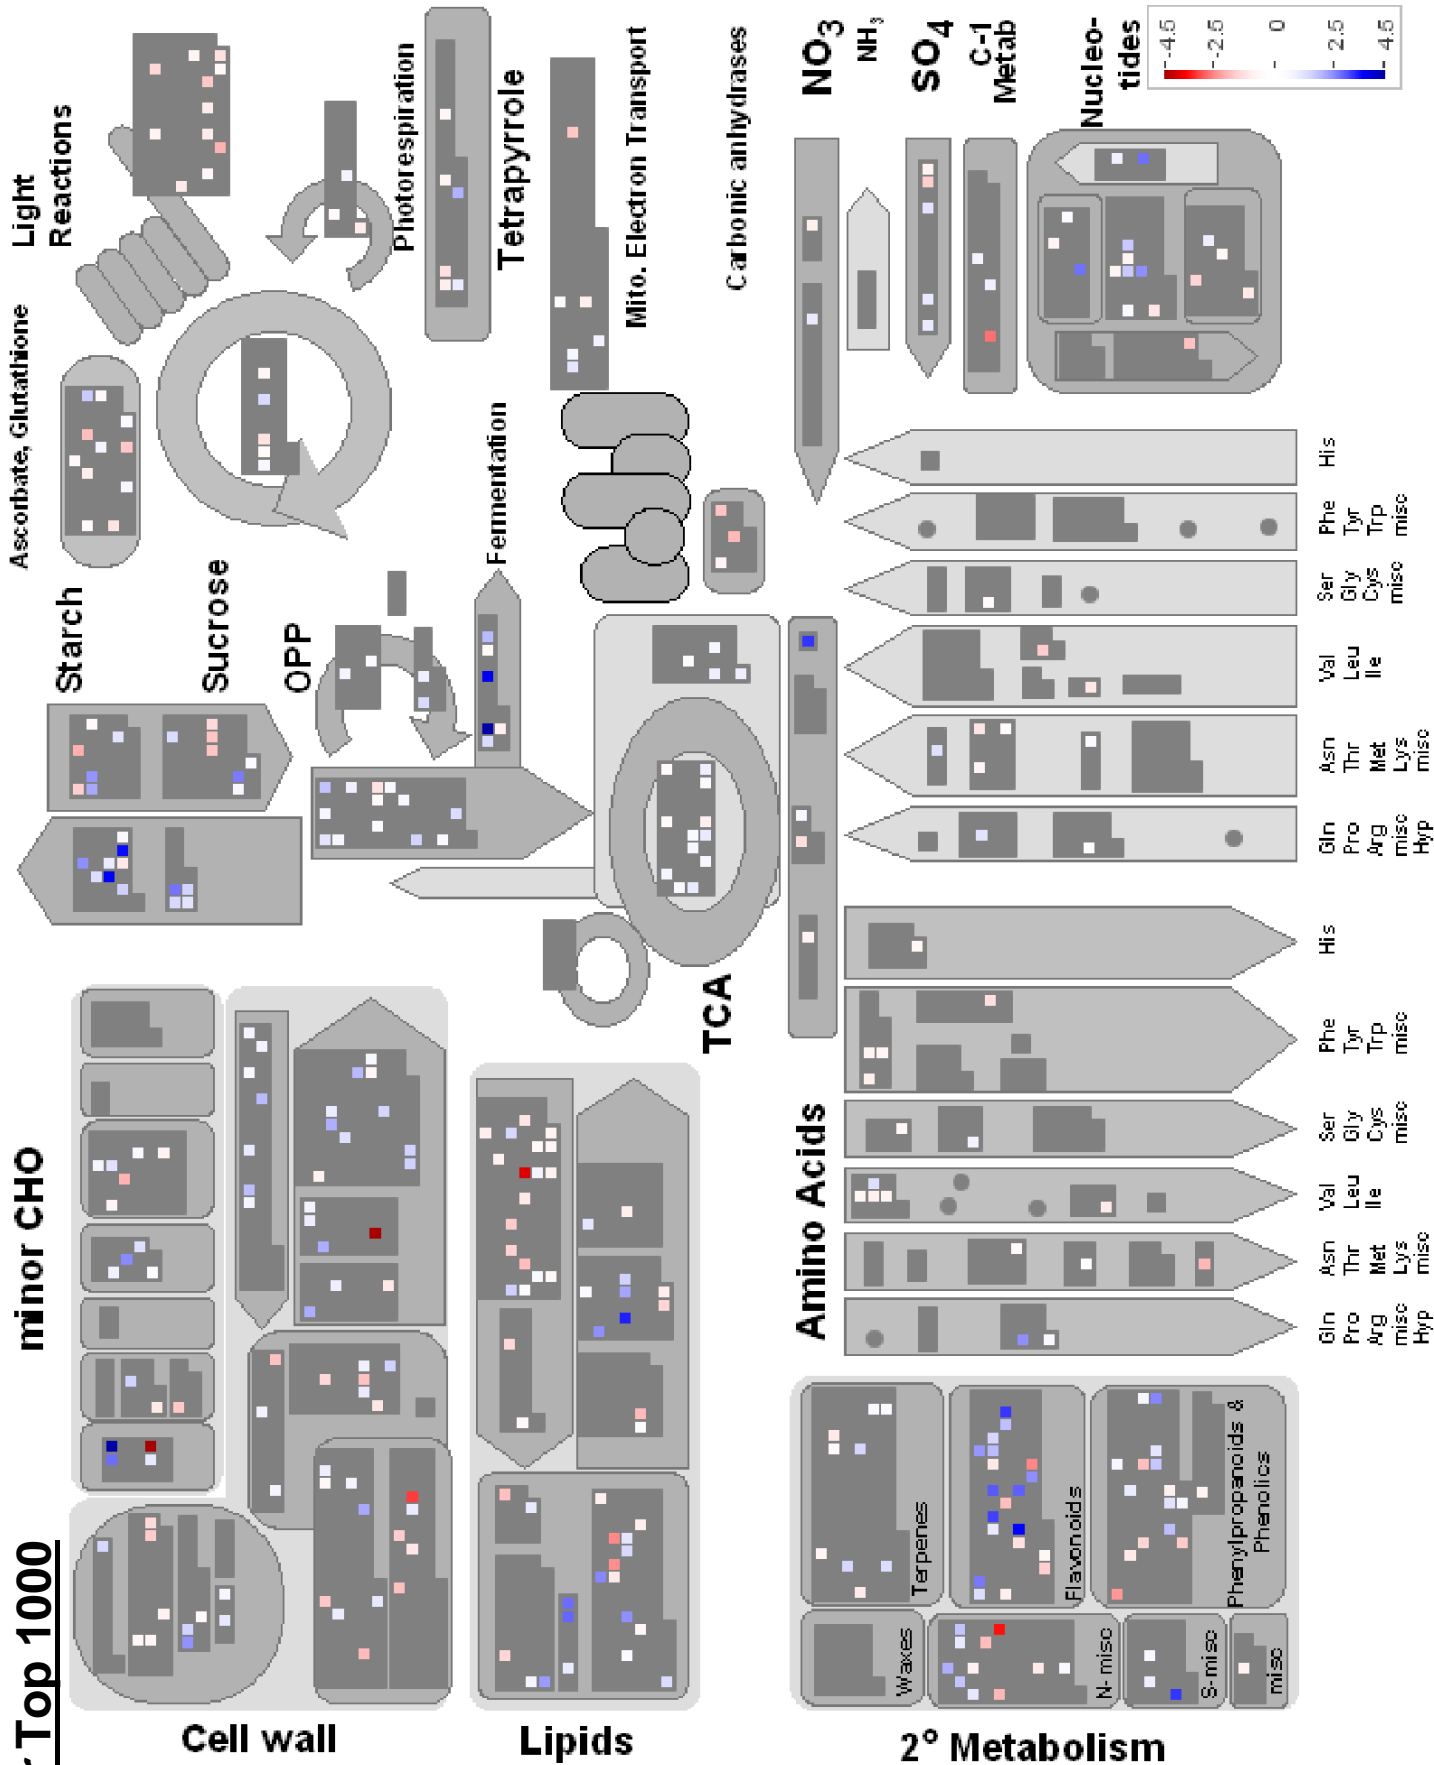

# Co Top 1000

## minor CHO

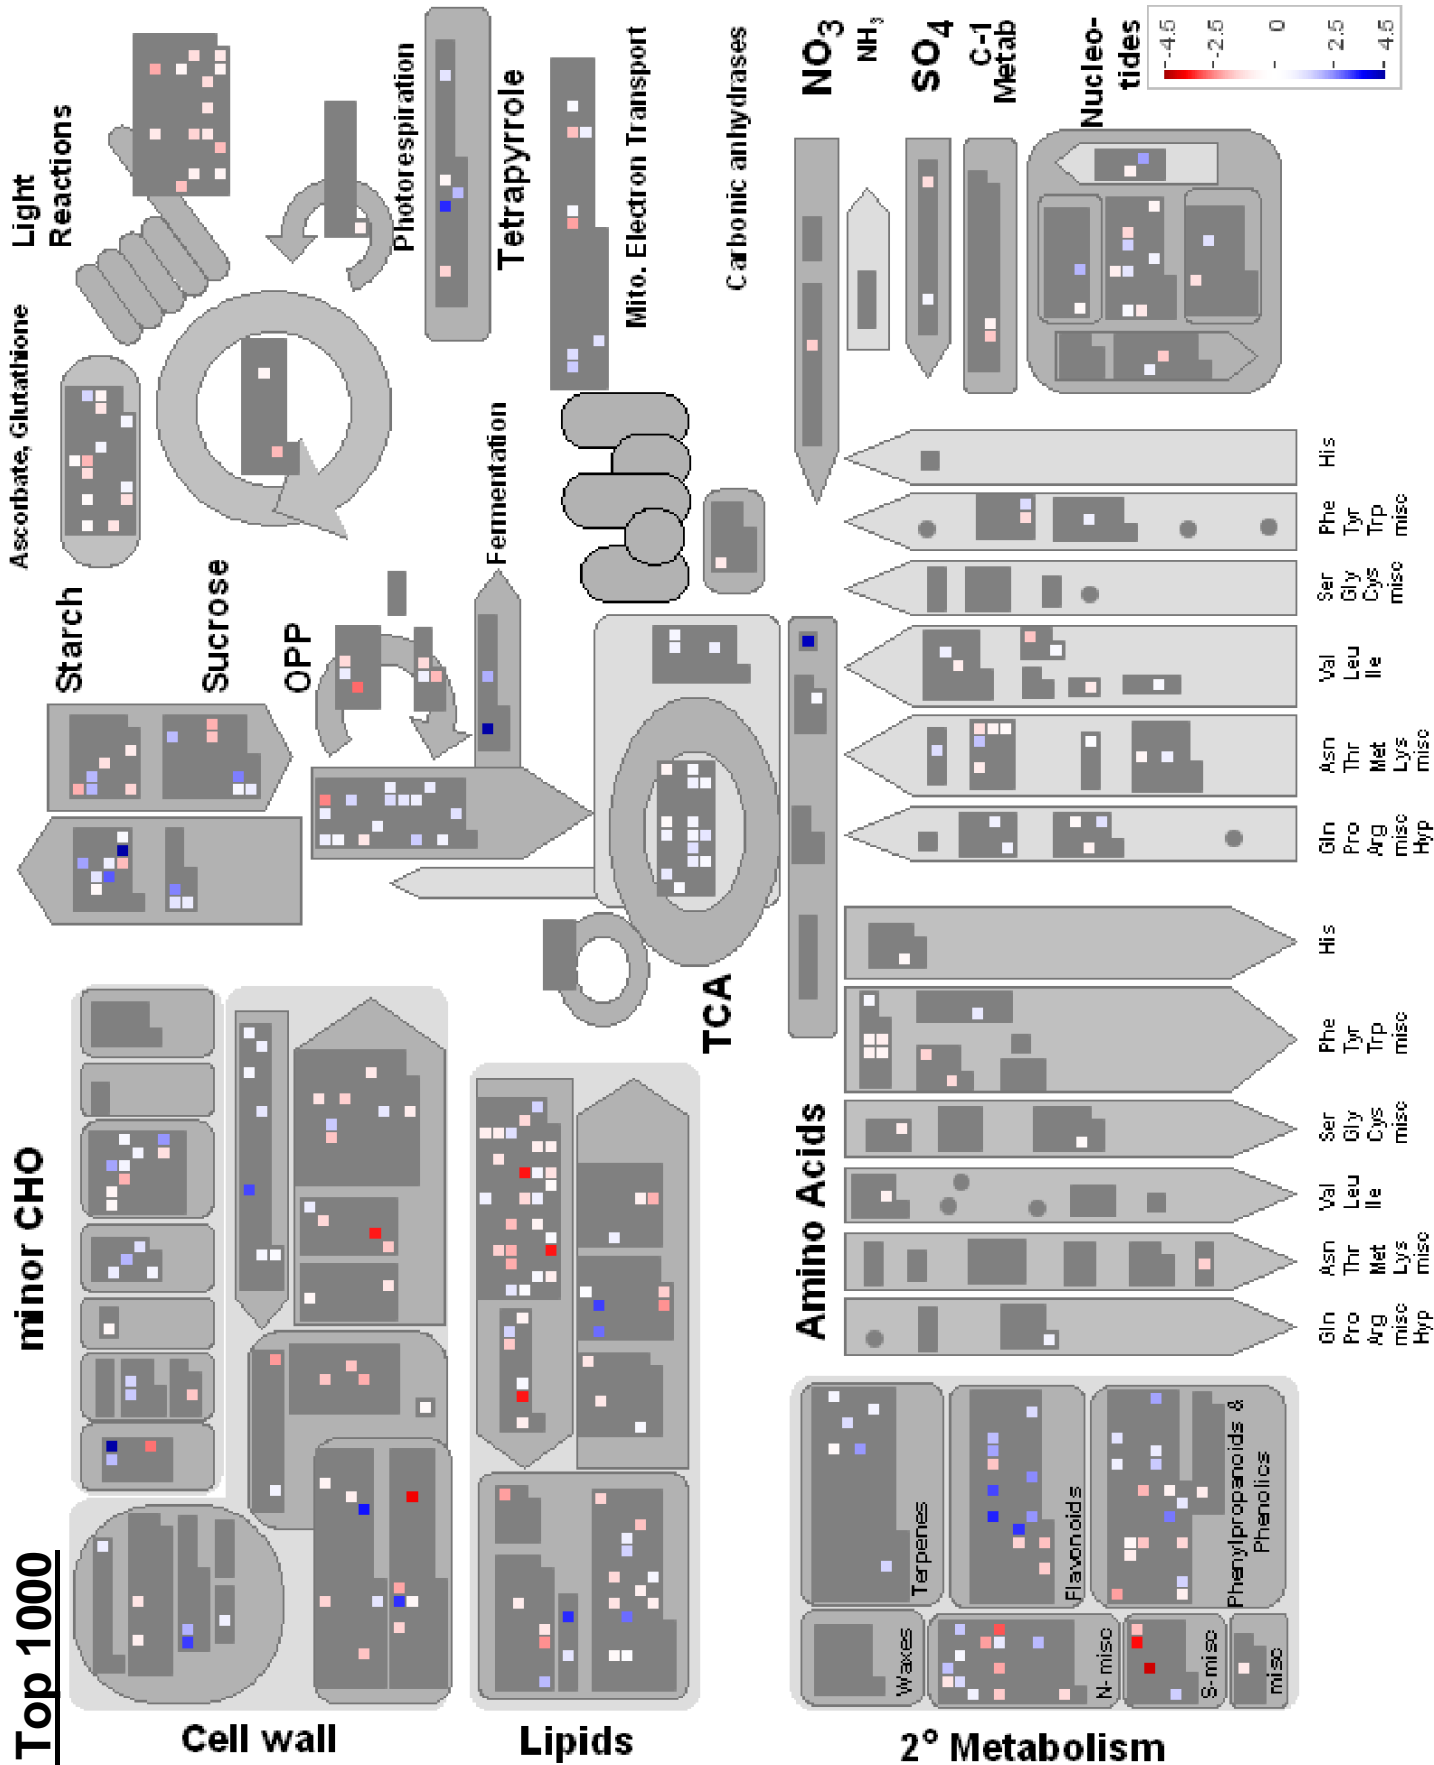

# C24 Top 1000

## minor CHO

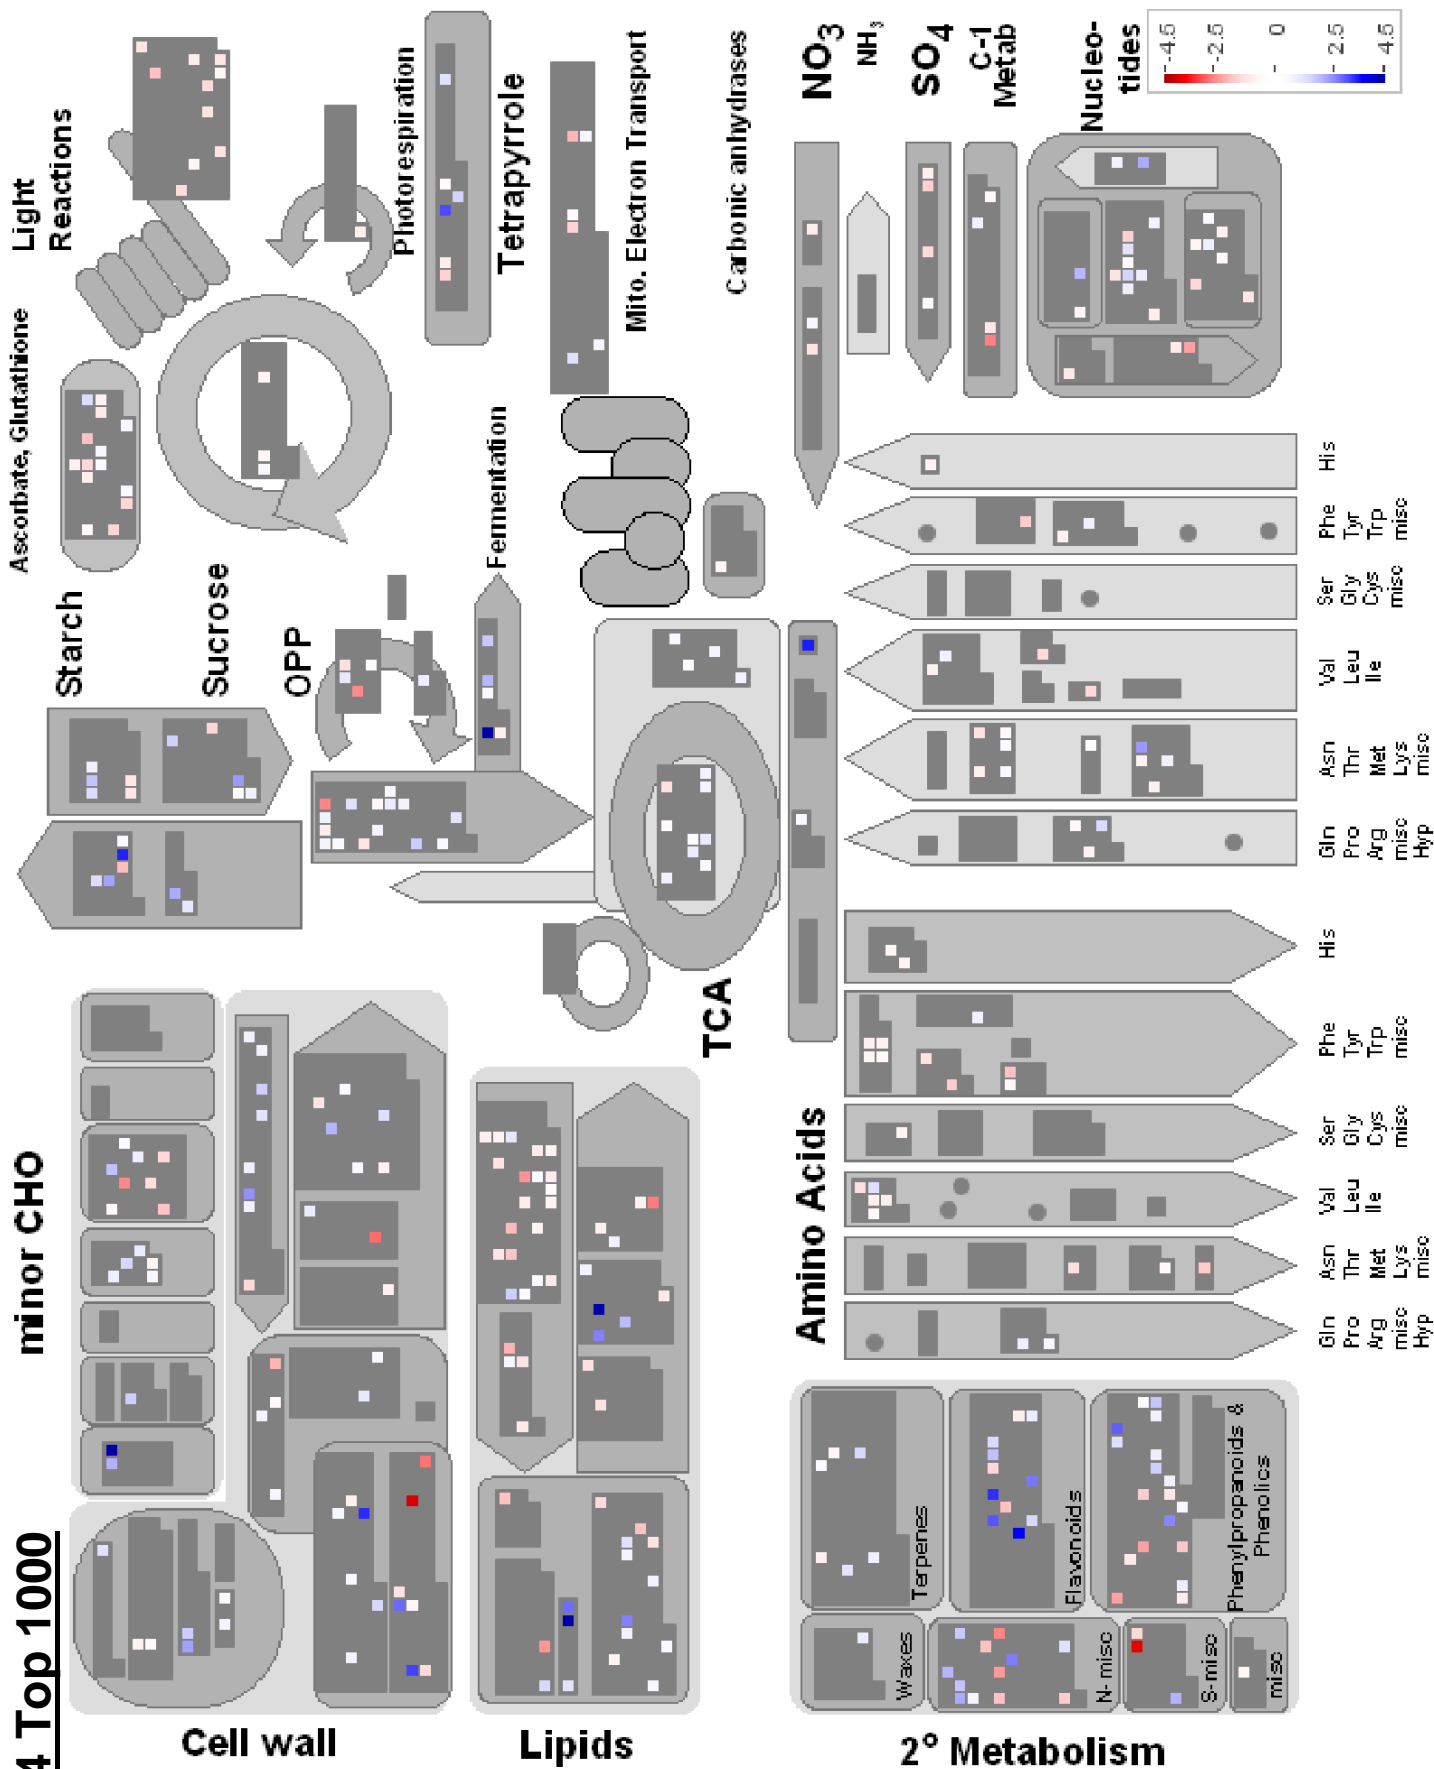

Cell wall

Lipids

2° Metabolism

Amino Acids

TCA

Fermentation

Carbonic anhydrases

Light Reactions

Ascorbate, Glutathione

Starch

Sucrose

OPP

Photorespiration

Tetrapyrrole

Mito. Electron Transport

NO<sub>3</sub>

NH<sub>3</sub>

SO<sub>4</sub>

C-1 Metab

Nucleotides

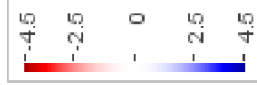

- Gln
- Pro
- Arg
- misc
- Hyp
- Asn
- Thr
- Met
- Lys
- misc
- Val
- Leu
- Ile
- Ser
- Gly
- Cys
- misc
- Phe
- Tyr
- Trp
- misc
- His



# Can Top 1000

## minor CHO

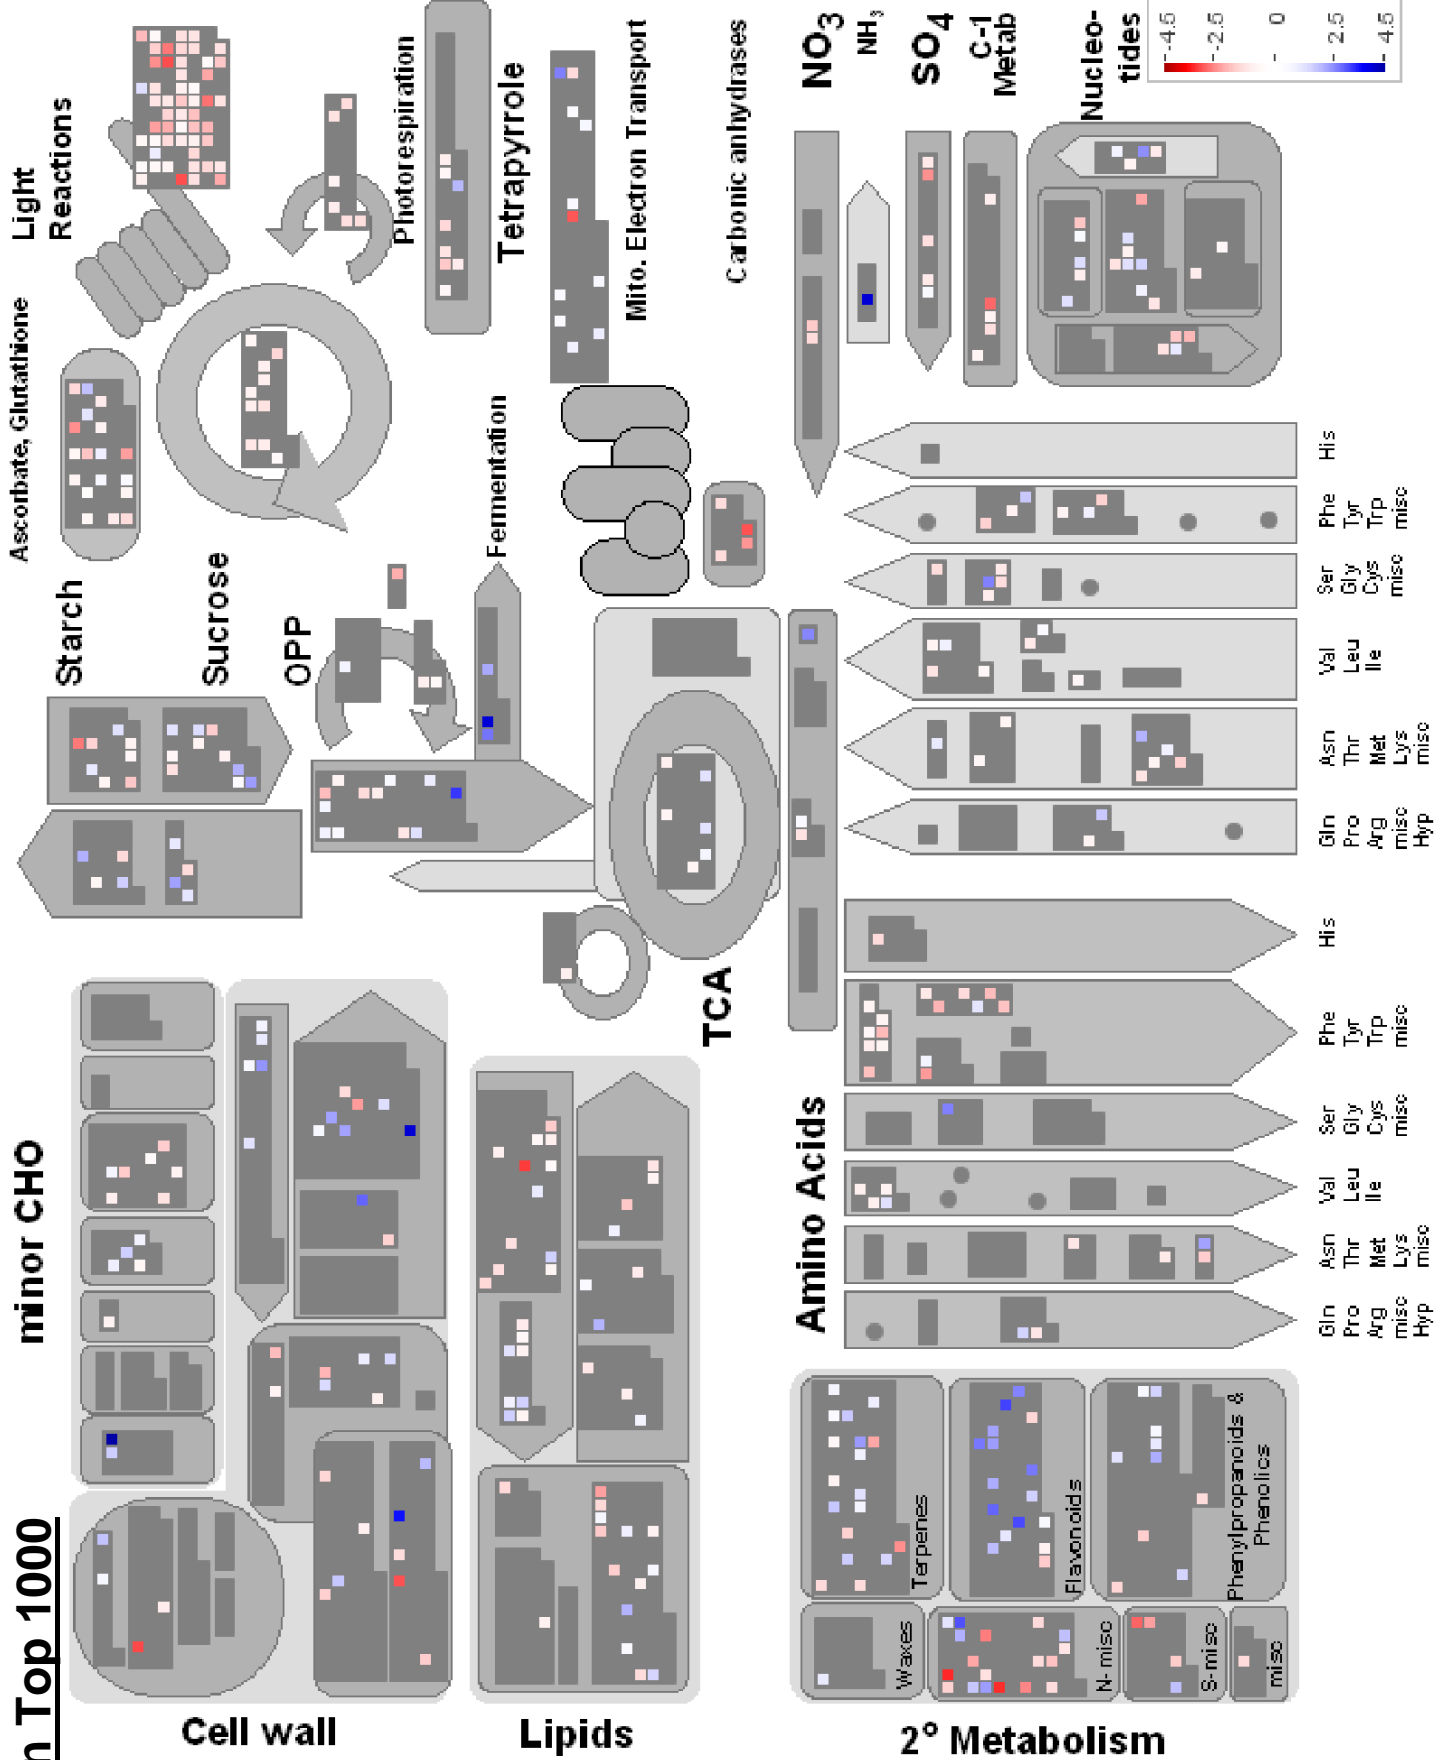

Cell wall

Lipids

2° Metabolism

Amino Acids

TCA

Fermentation

Carbonic anhydrases

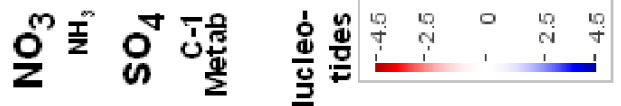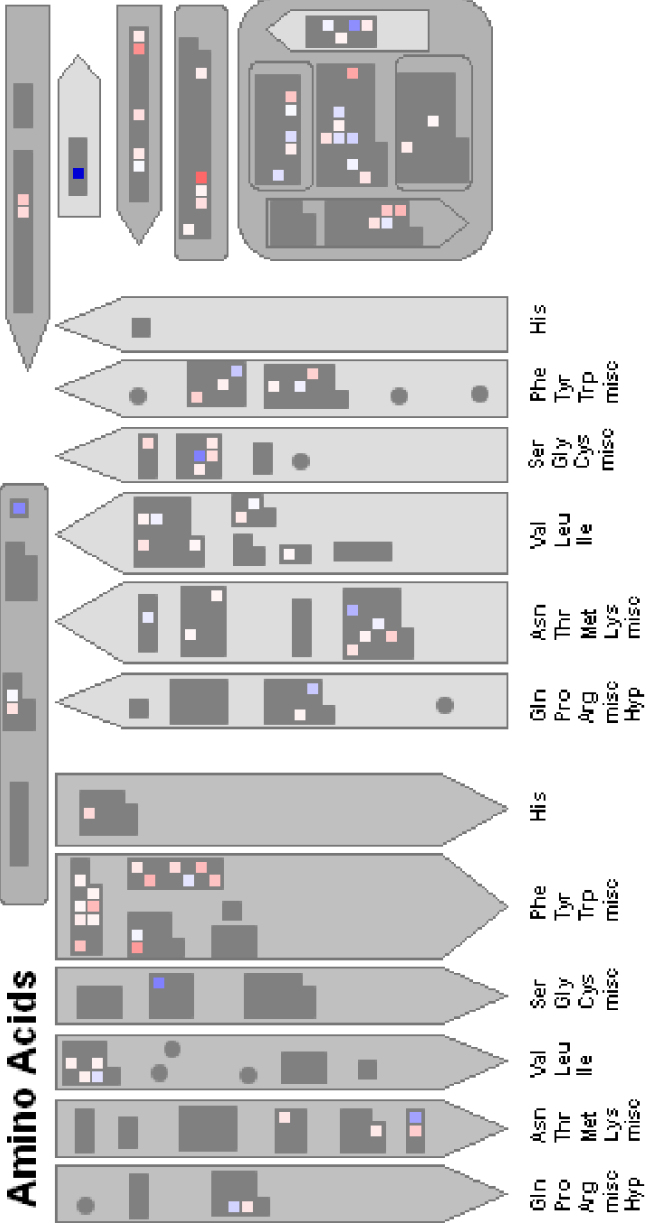

Light Reactions

Ascorbate, Glutathione

Starch

Sucrose

OPP

Photorespiration

Tetrapyrrole

Mito. Electron Transport

NO<sub>3</sub>

NH<sub>3</sub>

SO<sub>4</sub>

C-1 Metab

Nucleotides

- Gln
- Pro
- Arg
- misc
- Lys
- Hyp
- Asn
- Thr
- Met
- Lys
- Val
- Leu
- Ile
- Ser
- Gly
- Cys
- misc
- Phe
- Tyr
- Trp
- misc
- His

# Cvi Top 1000

## minor CHO

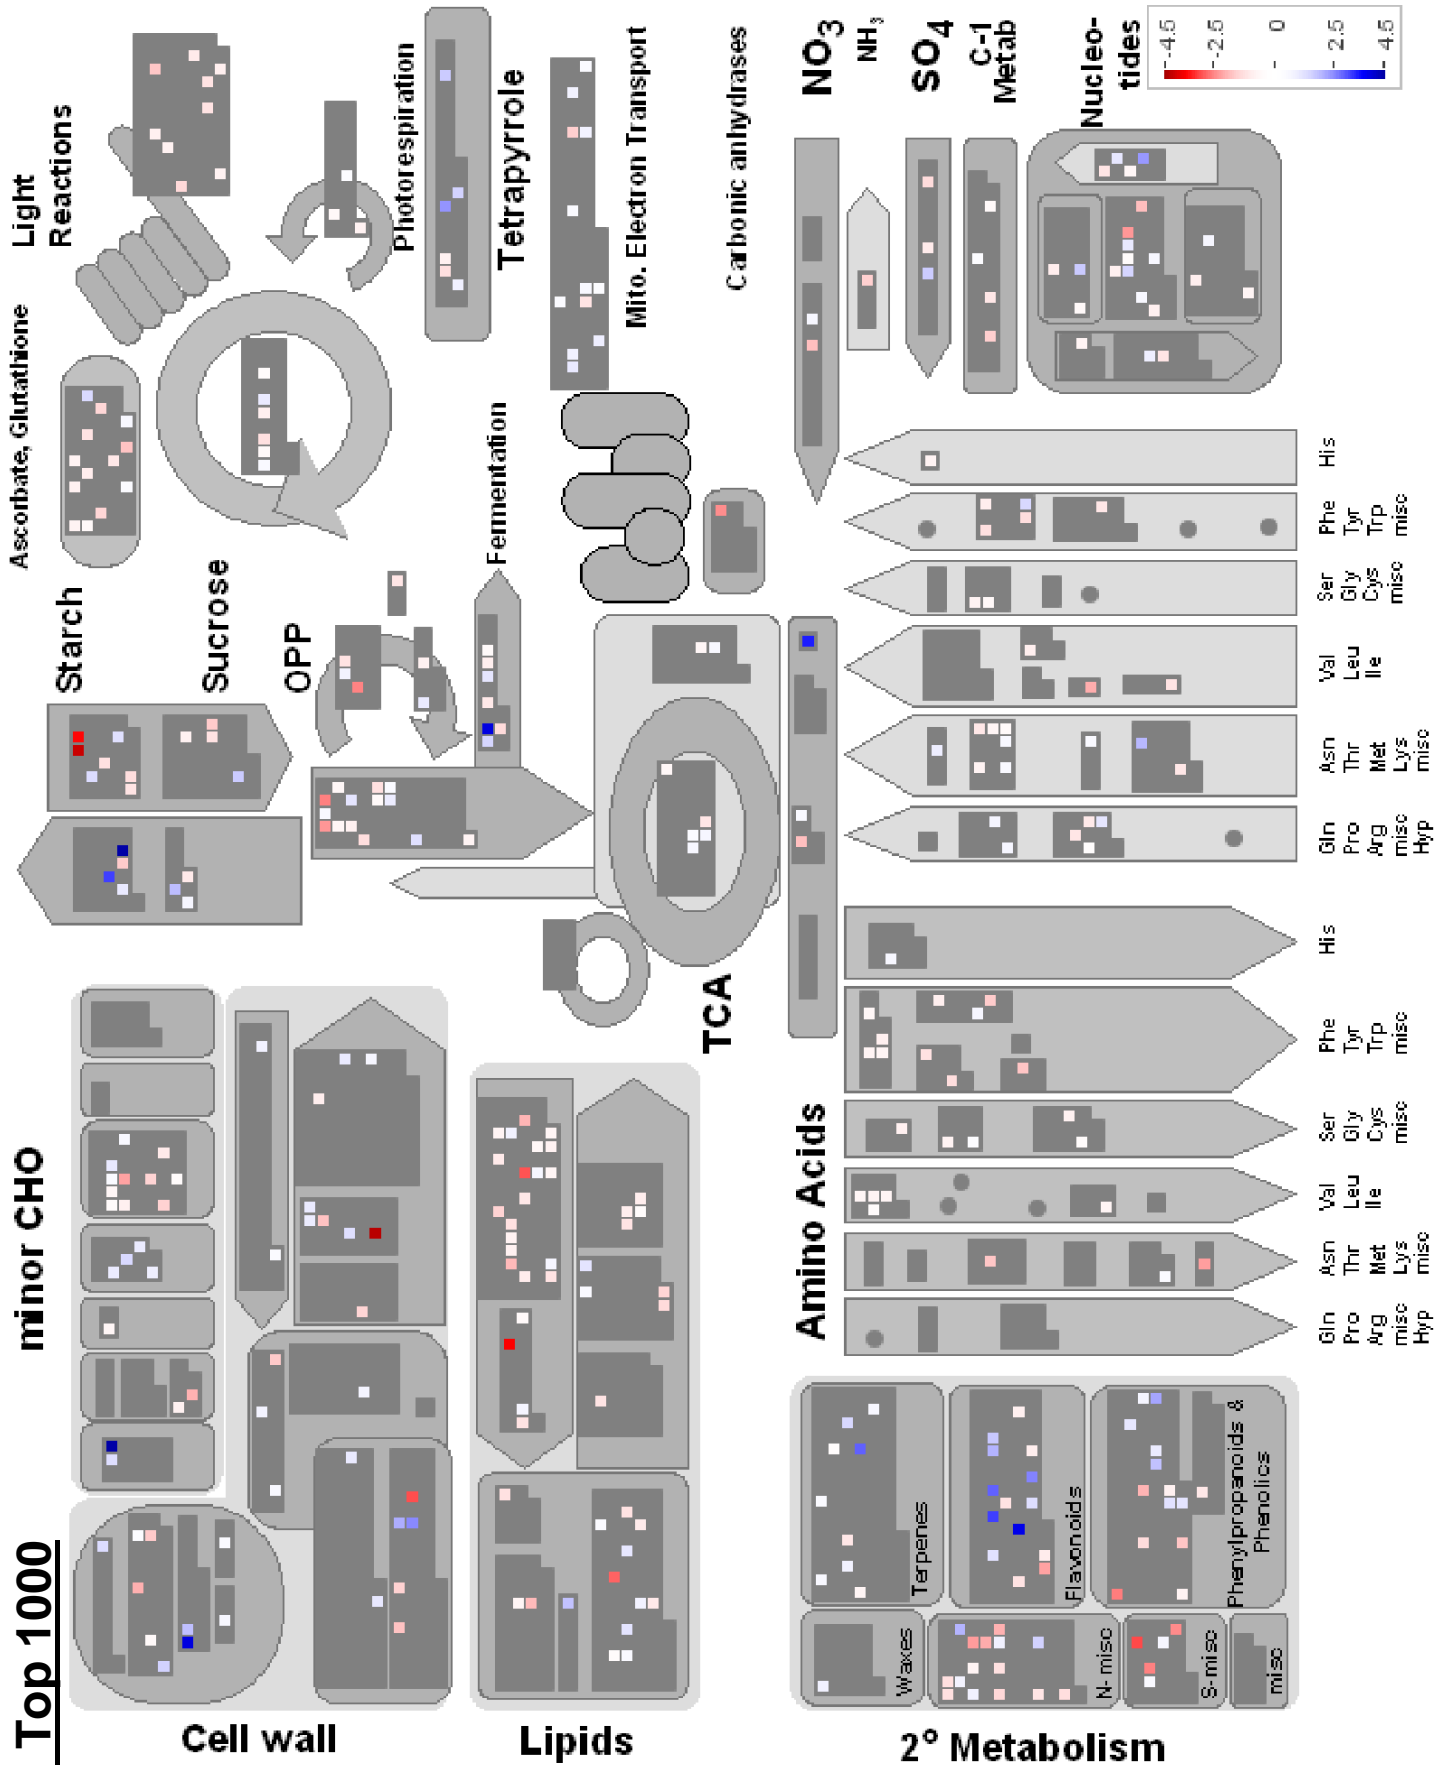

# All accessions 0.05 minor CHO

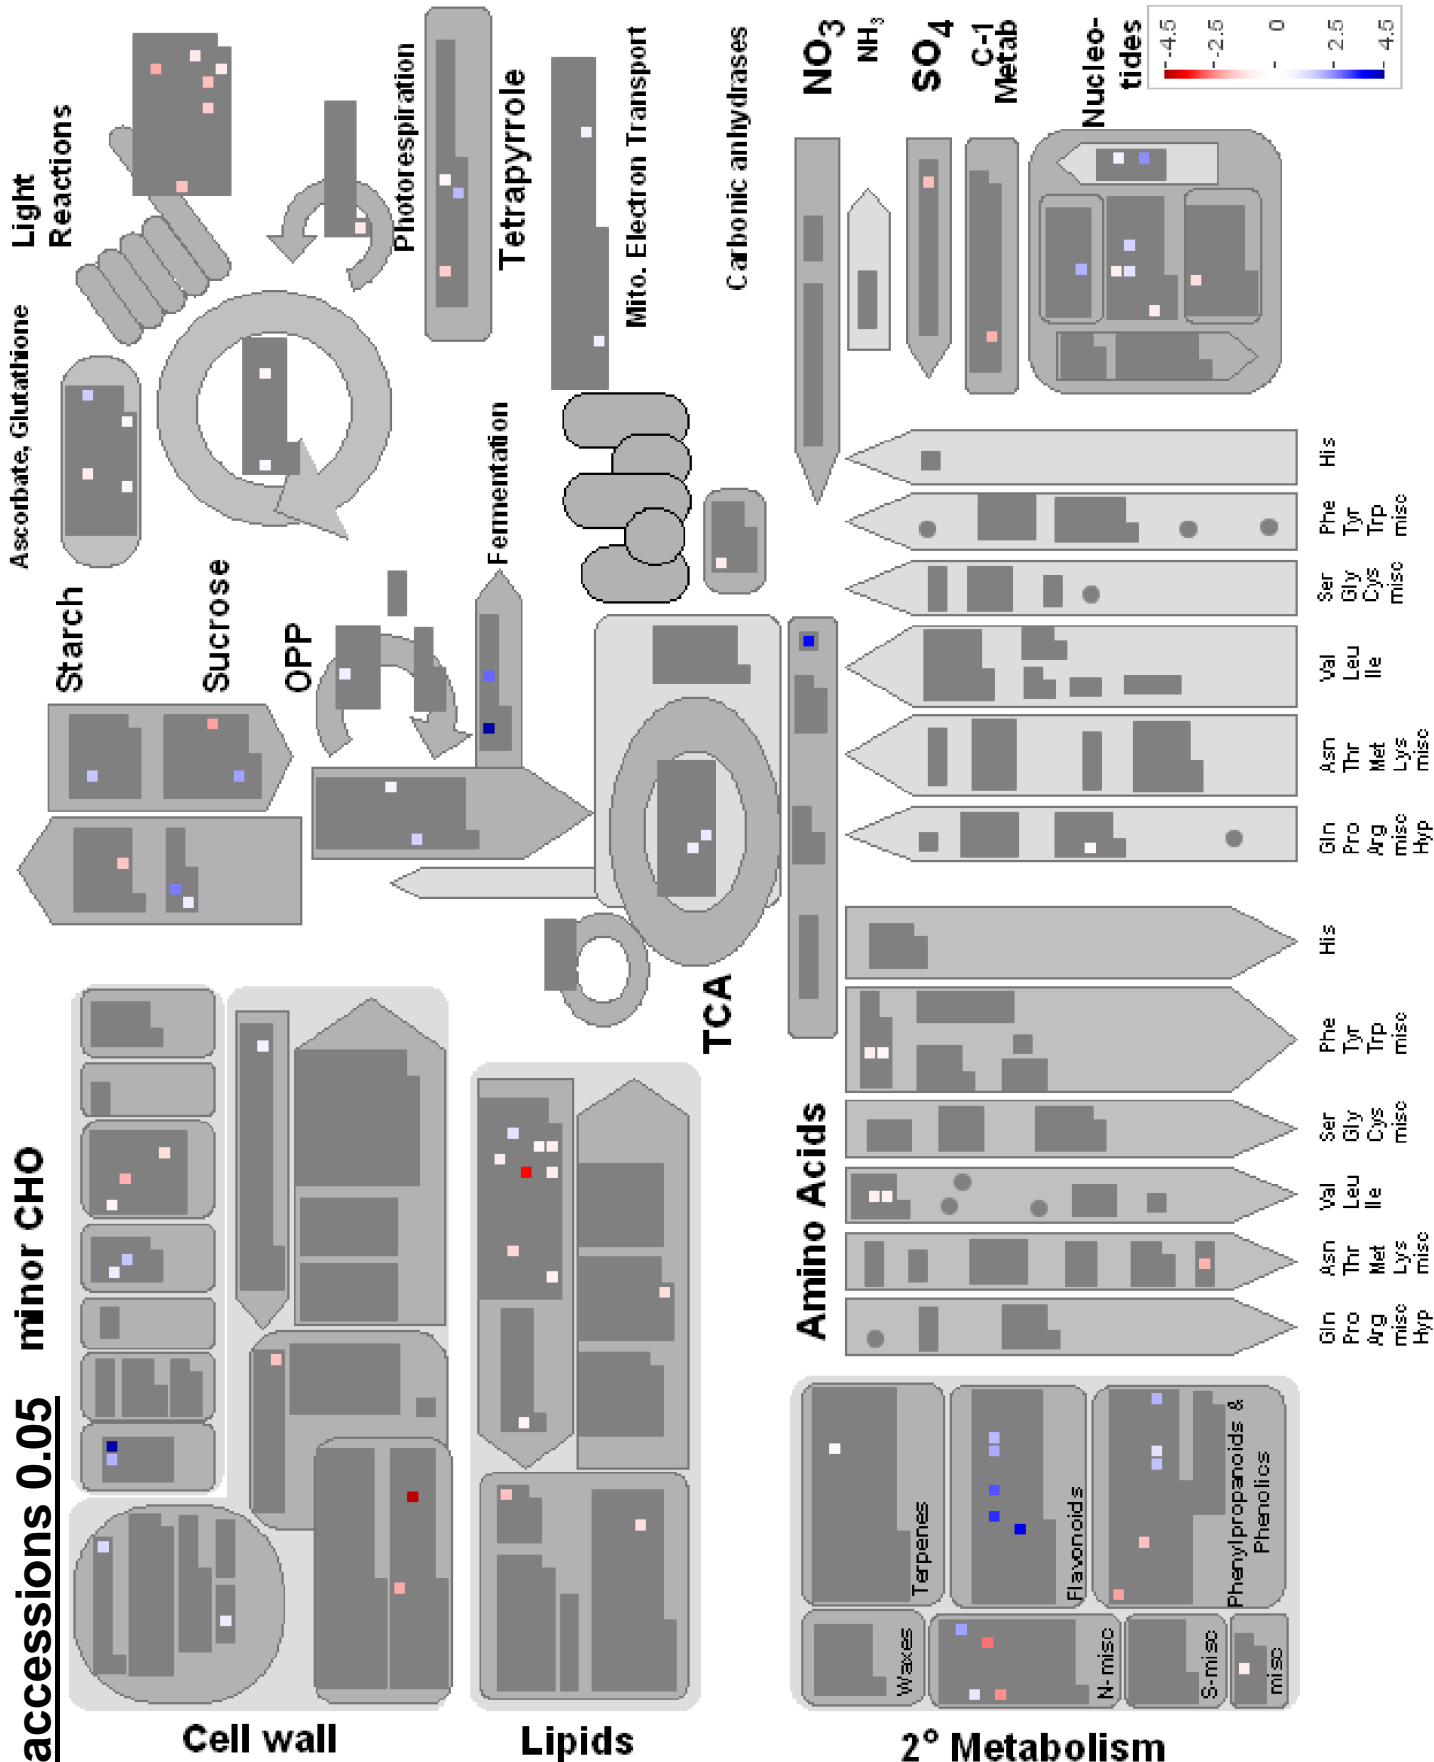

# ACC Correlation

## minor CHO

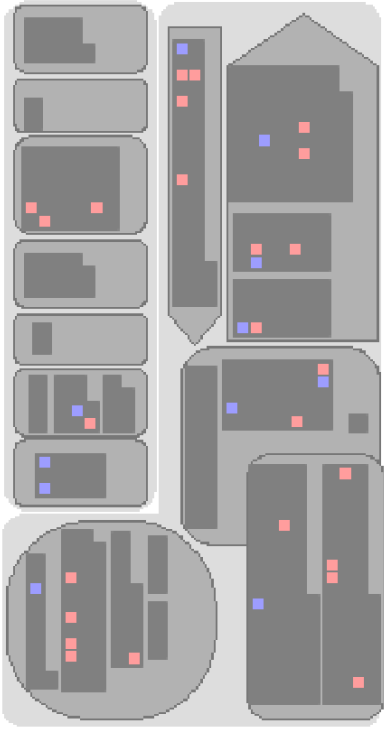

Cell wall

Lipids

## Light Reactions

## Ascorbate, Glutathione

## Starch

## Sucrose

## OPP

## Fermentation

## Tetrapyrrole

## Mito. Electron Transport

## TCA

## Carbonic anhydrases

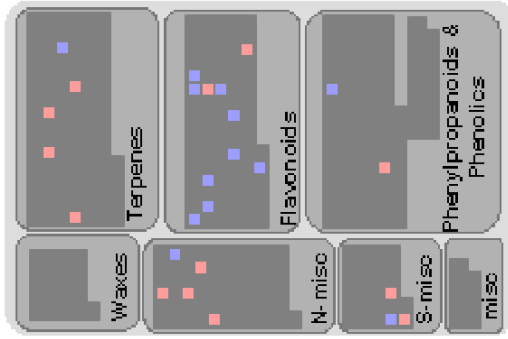

2° Metabolism

## Amino Acids

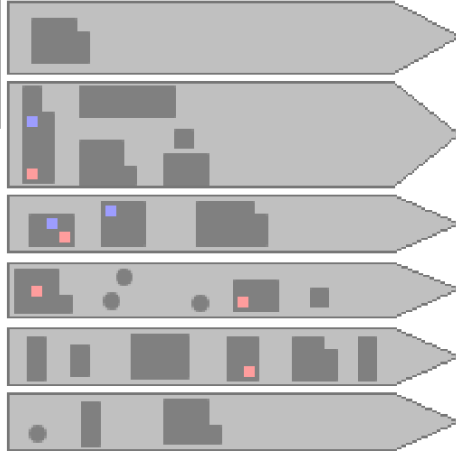

Gln  
Pro  
Arg  
misc  
Lys  
Hyp

Asn  
Thr  
Met  
Lys  
misc

Val  
Leu  
Ile

Ser  
Gly  
Cys  
misc

Phe  
Tyr  
Trp  
misc

His

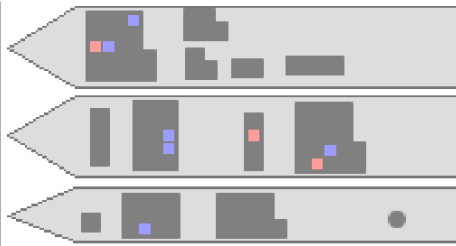

Gln  
Pro  
Arg  
misc  
Lys  
Hyp

Asn  
Thr  
Met  
Lys  
misc

Val  
Leu  
Ile

Ser  
Gly  
Cys  
misc

Phe  
Tyr  
Trp  
misc

His

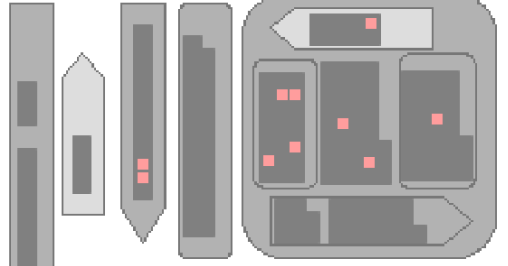

NO<sub>3</sub>  
NH<sub>3</sub>

SO<sub>4</sub>  
C-1  
Metab

Nucleo-  
tides

Red: -ve correlation

Blue: +ve correlation

# NA Te vs others

## minor CHO

## Light Reactions

## Ascorbate, Glutathione

## Starch

## Sucrose

## OPP

## Fermentation

## Tetrapyrrole

## Mito. Electron Transport

## Carbonic anhydrases

## NO<sub>3</sub>

## NH<sub>3</sub>

## SO<sub>4</sub>

## C-1 Metab

## Nucleotides

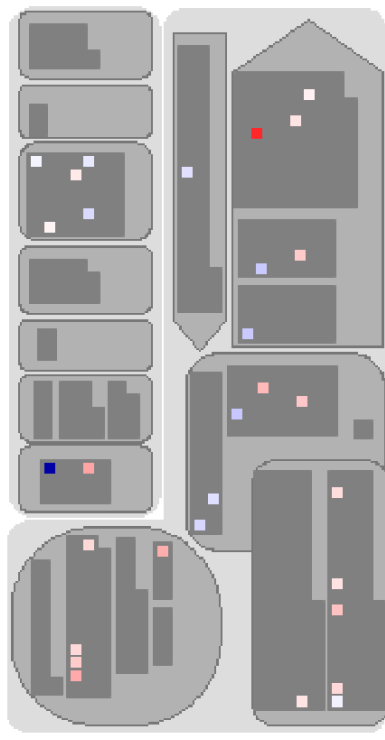

Cell wall

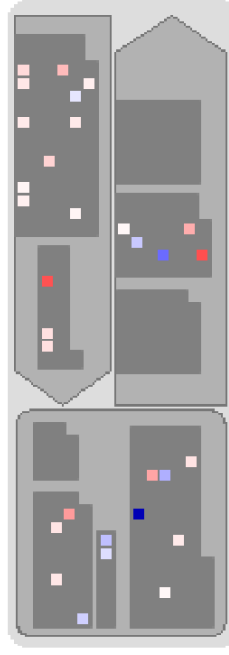

Lipids

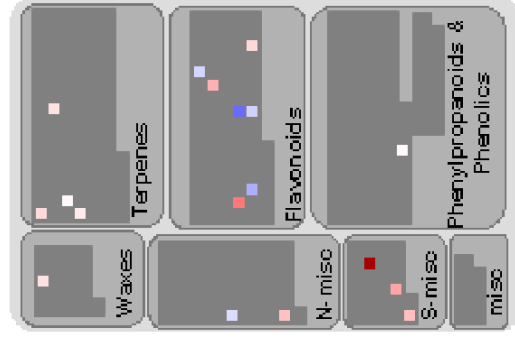

2° Metabolism

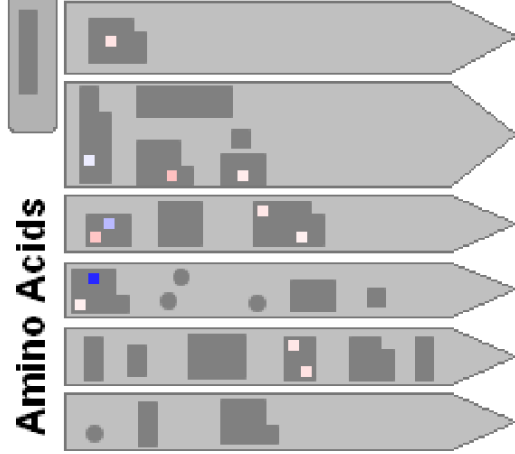

Amino Acids

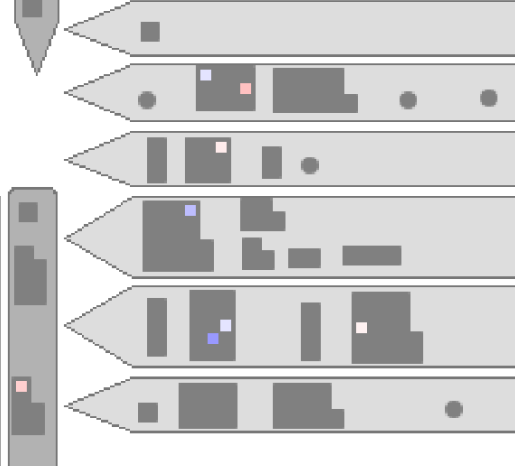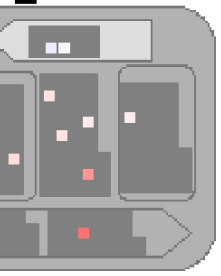

Nucleotides

- His
- Phe
- Tyr
- Trp
- misc
- Ser
- Gly
- Cys
- misc
- Val
- Leu
- Ile
- Asn
- Thr
- Met
- Lys
- Gln
- Pro
- Arg
- misc
- Hyp
- His
- Phe
- Tyr
- Trp
- misc
- Ser
- Gly
- Cys
- misc
- Val
- Leu
- Ile
- Asn
- Thr
- Met
- Lys
- Gln
- Pro
- Arg
- misc
- Hyp
- Waxes
- Terpenes
- N-misc
- S-misc
- misc
- Flavonoids
- Phenylpropanoids & Phenolics
- Gln
- Pro
- Arg
- misc
- Lys
- Hyp
- Asn
- Thr
- Met
- Lys
- misc
- Val
- Leu
- Ile
- Ser
- Gly
- Cys
- misc
- His
- Phe
- Tyr
- Trp
- misc
- Ser
- Gly
- Cys
- misc
- Val
- Leu
- Ile
- Asn
- Thr
- Met
- Lys
- Gln
- Pro
- Arg
- misc
- Hyp
- His
- Phe
- Tyr
- Trp
- misc
- Ser
- Gly
- Cys
- misc
- Val
- Leu
- Ile
- Asn
- Thr
- Met
- Lys
- Gln
- Pro
- Arg
- misc
- Hyp

# NA Can vs others

## minor CHO

## Light Reactions

## Ascorbate, Glutathione

## Starch

## Sucrose

## OPP

## Fermentation

## Tetrapyrrole

## Mito. Electron Transport

## Carbonic anhydrases

## NO<sub>3</sub> NH<sub>3</sub>

## SO<sub>4</sub> C-1 Metab

## Nucleo- tides

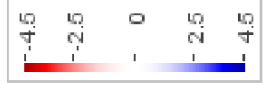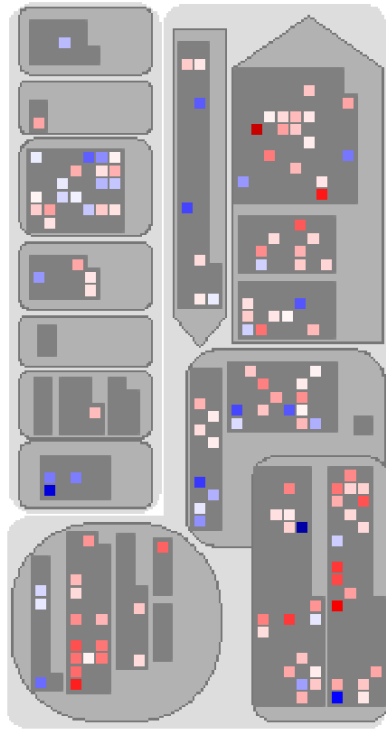

## Cell wall

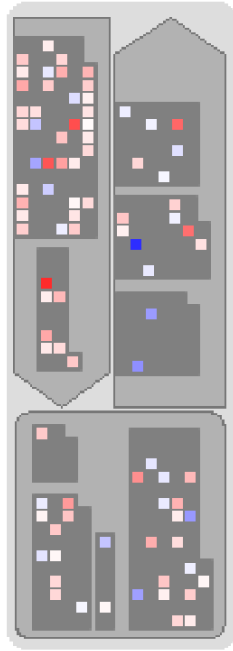

## Lipids

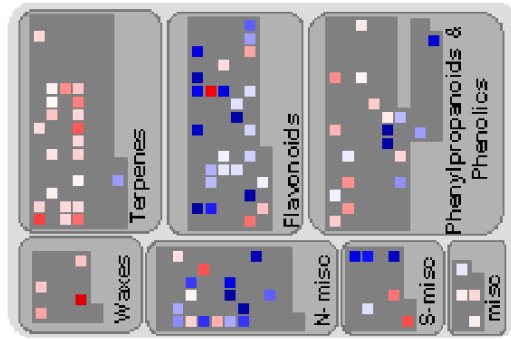

## 2° Metabolism

## Amino Acids

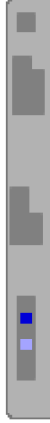

## TCA

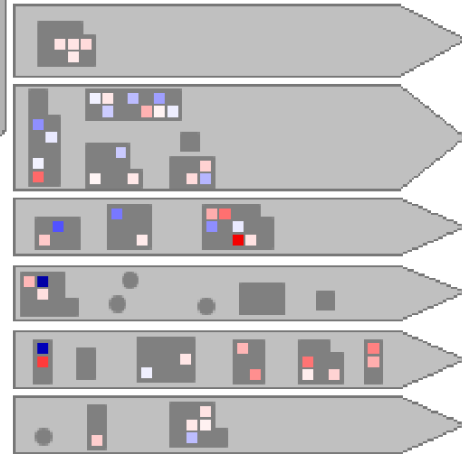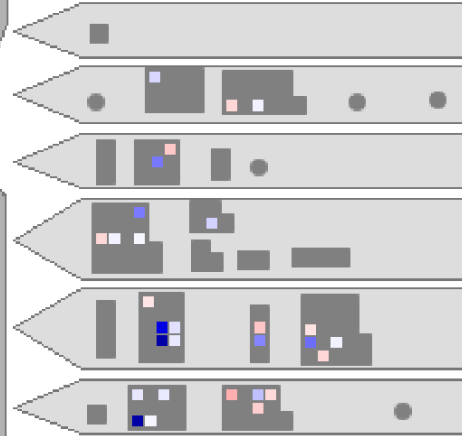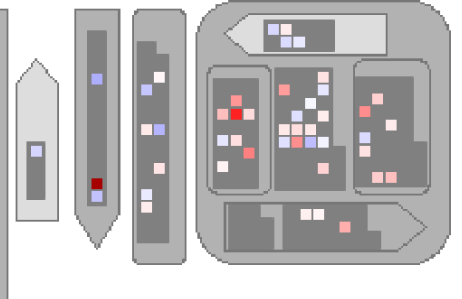

|     |     |     |      |     |     |     |     |     |      |     |     |     |     |     |      |     |     |     |     |     |     |     |     |     |     |     |     |     |     |     |      |     |     |     |      |     |
|-----|-----|-----|------|-----|-----|-----|-----|-----|------|-----|-----|-----|-----|-----|------|-----|-----|-----|-----|-----|-----|-----|-----|-----|-----|-----|-----|-----|-----|-----|------|-----|-----|-----|------|-----|
| Gln | Pro | Arg | misc | Lys | Hyp | Gln | Pro | Arg | misc | Lys | Hyp | Gln | Pro | Arg | misc | Lys | Hyp | Asn | Thr | Met | Lys | Val | Leu | Ile | Val | Leu | Ile | Ser | Gly | Cys | misc | Phe | Tyr | Trp | misc | His |
|-----|-----|-----|------|-----|-----|-----|-----|-----|------|-----|-----|-----|-----|-----|------|-----|-----|-----|-----|-----|-----|-----|-----|-----|-----|-----|-----|-----|-----|-----|------|-----|-----|-----|------|-----|
