# Supplementary material
Source: PubMed Central journal article supplement (PMC1557609)

**Supplemental Figure 2.** Hierarchical clustering of metabolite changes during cold acclimation. This is a higher resolution version of Figure 4 and includes metabolite names. Metabolite names for the odd and even rows are in the first and second columns, respectively.

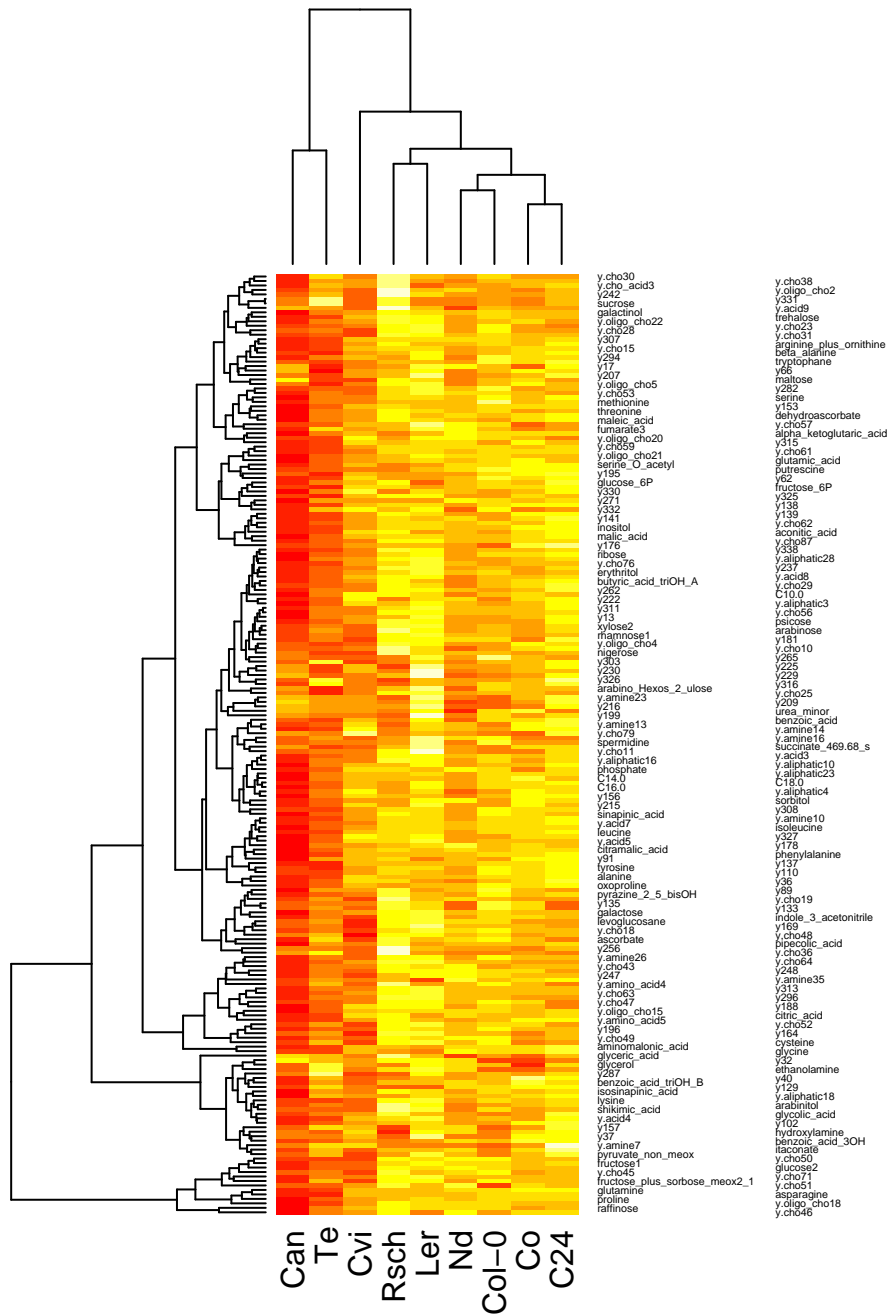

Supplement: plntphys_pp.106.081141_4.pdf [file plntphys_pp.106.081141_4.pdf]
